# Supplementary material for: Self-assembly of a graphene oxide/MnFe2O4 motor by coupling shear force with capillarity for removal of toxic heavy metals
Source: Royal Society of Chemistry journal article supplement (doi:10.1039/c8ta06663a), 2018-01-01
Supplement: c8ta06663a1.pdf [file c8ta06663a1.pdf]

## Supporting Information

### Self-assembly of graphene oxide/MnFe<sub>2</sub>O<sub>4</sub> motor by coupling shear force with capillarity for removal of toxic heavy metals

Xiyue Peng,<sup>a†</sup> Feng Gao,<sup>a†</sup> Jiaxin Zhao,<sup>b</sup> Jielan Li,<sup>b</sup> Jiangying Qu,<sup>a\*</sup> Hongbo Fan<sup>a\*</sup>

<sup>a</sup>*School of Environment and Civil Engineering, Dongguan University of Technology, Dongguan, Guangdong, 523808, China*

<sup>b</sup>*Faculty of Chemistry and Chemical Engineering, Liaoning Normal University, Dalian, 116029, China*

Corresponding author, Tel: +86-769-22861232. E-mail: qujy@lnnu.edu.cn, fhb@dgut.edu.cn

It's noticed that the motor started from the right side of the channel and arrived at the opposite side within 7s. With the help of magnet, the motor subsequently swam back to the position where was started. The moving trajectories were shown by red arrow.

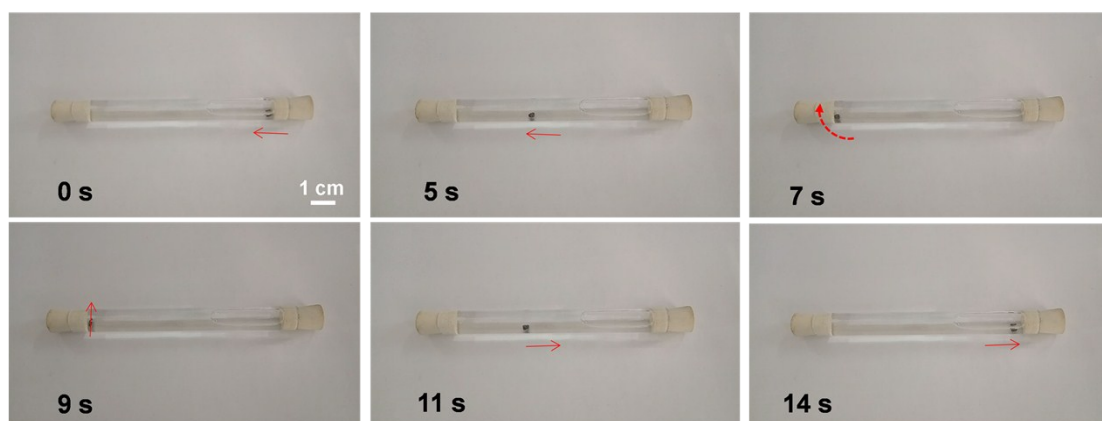

Fig. SP1 Photo images of GO/MnFe<sub>2</sub>O<sub>4</sub> motor controlled by magnetic guidance swimming in a straight channel.

As shown in Fig. SP2, SEM images of the recovered GO/MnFe<sub>2</sub>O<sub>4</sub> motor after its reusability suggest that the morphology and structure of the motor are similar to the original ones shown in Fig. 4, demonstrating good recycling stability of GO/MnFe<sub>2</sub>O<sub>4</sub> motor as the adsorbent for removal of heavy metal ions.

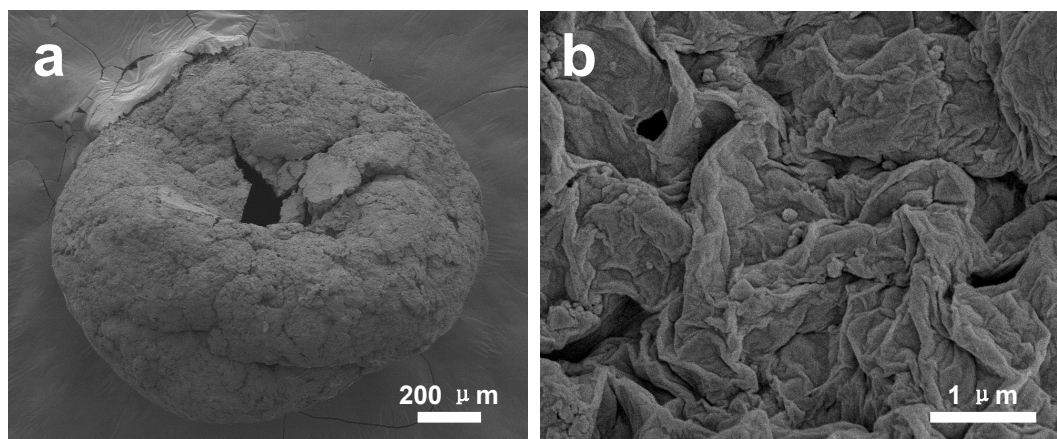

Fig. SP2 SEM images of (a) the front surface and (b) inner wall of the recycled GO/MnFe<sub>2</sub>O<sub>4</sub> motor after ten runs

Table S1 Comparison of Adsorption Capacities between Various Adsorbents

|                  | Adsorbent                                                      | Adsorption capacity (mg g <sup>-1</sup> ) | References       |
|------------------|----------------------------------------------------------------|-------------------------------------------|------------------|
|                  | <b>GO/MnFe<sub>2</sub>O<sub>4</sub></b>                        | <b>100</b>                                | <b>This work</b> |
| Pb <sup>2+</sup> | Gl-RGO monoliths                                               | 101.1                                     | [1]              |
|                  | GO/chitosan composite                                          | 76.9                                      | [2]              |
|                  | Fe <sub>3</sub> O <sub>4</sub> microrose                       | 45.4                                      | [3]              |
|                  | <b>GO/MnFe<sub>2</sub>O<sub>4</sub></b>                        | <b>100</b>                                | <b>This work</b> |
| Cd <sup>2+</sup> | MGO                                                            | 91.29                                     | [4]              |
|                  | Fe <sub>3</sub> O <sub>4</sub> /MnO <sub>2</sub> nanocomposite | 53.2                                      | [5]              |
|                  | Fe <sub>3</sub> O <sub>4</sub> /cyclodextrin polymer           | 27.70                                     | [6]              |

## References

1. Q. Fang, X. Zhou, W. Deng and Z. Liu, *Chemical Engineering Journal*, 2017, **308**, 1001-1009.
2. L. Fan, C. Luo, M. Sun, X. Li and H. Qiu, *Colloids Surf B Biointerfaces*, 2013, **103**, 523-529.
3. L. Han and Y. Wei, *Materials Letters*, 2012, **70**, 1-3.
4. J. Deng, X. R. Zhang, G. M. Zeng, J. L. Gong, Q. Y. Niu and J. Liang, *Chemical Engineering Journal*, 2013, **226**, 189-200.
5. E. J. Kim, C. S. Lee, Y. Y. Chang and Y. S. Chang, *ACS Appl Mater Interfaces*, 2013, **5**, 9628-9634.
6. A. Z. Badruddoza, Z. B. Shawon, W. J. Tay, K. Hidajat and M. S. Uddin, *Carbohydrate polymers*, 2013, **91**, 322-332.
